# Supplementary material for: Essential role for the planarian intestinal GATA transcription factor in stem cells and regeneration
Source: PubMed Central journal article supplement — Dev Biol. Author manuscript; Available in PMC 2016 Oct 7. (PMC5055475; doi:10.1016/j.ydbio.2016.08.015), 2016-08-16

# Figure S1

A

|                        | N-Terminal Finger                                                | Basic Region | % Identity to<br>Smed-gata4/5/6 |
|------------------------|------------------------------------------------------------------|--------------|---------------------------------|
| GATA-4_H.sapiens       | * * * * *                                                        | * * * * *    |                                 |
|                        | CVNCGAMSTPLWRRDGTGHYLCNACGLYHKMNGINRPLIKPQRRLSASRR-----          |              | 44                              |
| GATA-5_H.sapiens       |                                                                  | * * * * *    |                                 |
|                        | CVNCGALSTPLWRRDGTGHYLCNACGLYHKMNGVNRPLVRPQKRLSSSRR-----          |              | 46                              |
| GATA-6_H.sapiens       |                                                                  | * * * * *    |                                 |
|                        | CVNCGSIQTPLWRRDGTGHYLCNACGLYSKMNGLSRPLIKPQKRVPSRR-----           |              | 51                              |
| GATA456_S.mediterranea |                                                                  | * * * * *    |                                 |
|                        | CVNCGASNTQLWSRDNSGYLCCDCDRFSQNNRSRNLKLPINQVSSSTENEFMKKSANFQQYQGR |              | -                               |
|                        |                                                                  |              |                                 |
|                        | C-Terminal Finger                                                | Basic Region |                                 |
| GATA-4_H.sapiens       | * * * * *                                                        | * * * * *    | 77                              |
|                        | CANCTTTTTLWRRNAEGEPVCNACGLYMKLHGVPRLAMRKEGIQTRKRKPK              |              |                                 |
| GATA-5_H.sapiens       |                                                                  | * * * * *    | 79                              |
|                        | CTNCHTTTTLWRRNSEGEPVCNACGLYMKLHGVPRLAMKKEIQTRKRKPK               |              |                                 |
| GATA-6_H.sapiens       |                                                                  | * * * * *    | 75                              |
|                        | CANCHTTTTLWRRNAEGEPVCNACGLYMKLHGVPRLAMKKEIQTRKRKPK               |              |                                 |
| GATA456_S.mediterranea |                                                                  | * * * * *    | -                               |
|                        | CSNCKITKTSLWRRNNEGEPVCNACGLYKHLKLSRPLSMRKEGIQTRKRKPK             |              |                                 |

B

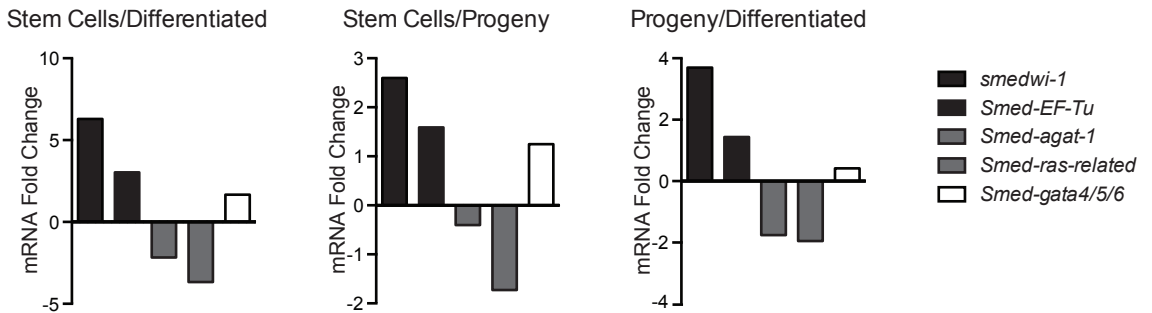

C

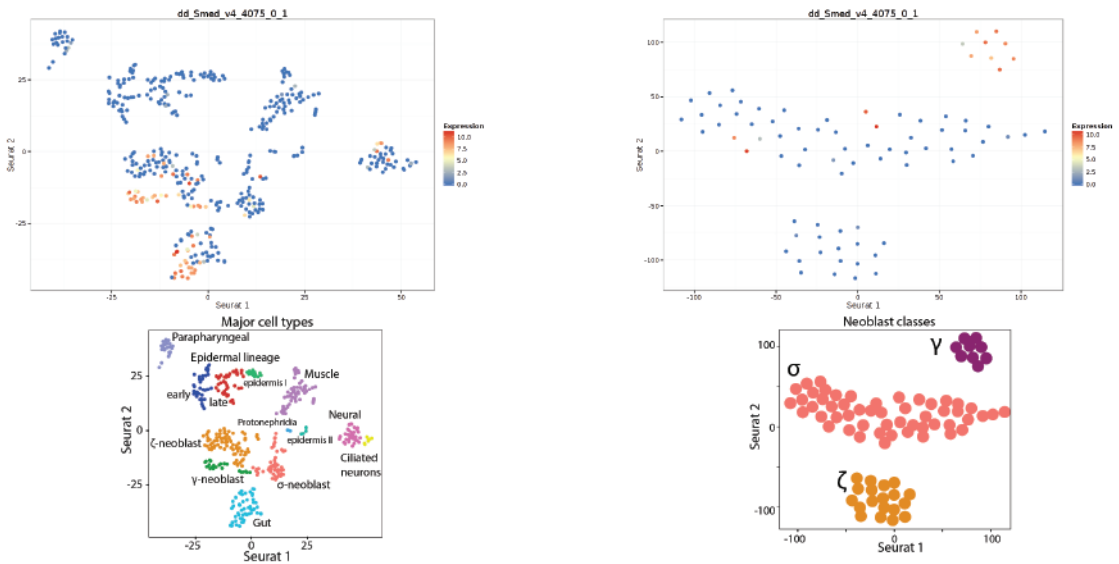

Supplement: NIHMS820016-supplement-2.pdf [file NIHMS820016-supplement-2.pdf]
