# Supplementary figures and images for: Essential role for the planarian intestinal GATA transcription factor in stem cells and regeneration
Source: PubMed Central journal article supplement — Dev Biol. Author manuscript; Available in PMC 2016 Oct 7. (PMC5055475; doi:10.1016/j.ydbio.2016.08.015), 2016-08-16

# Figure S2

A

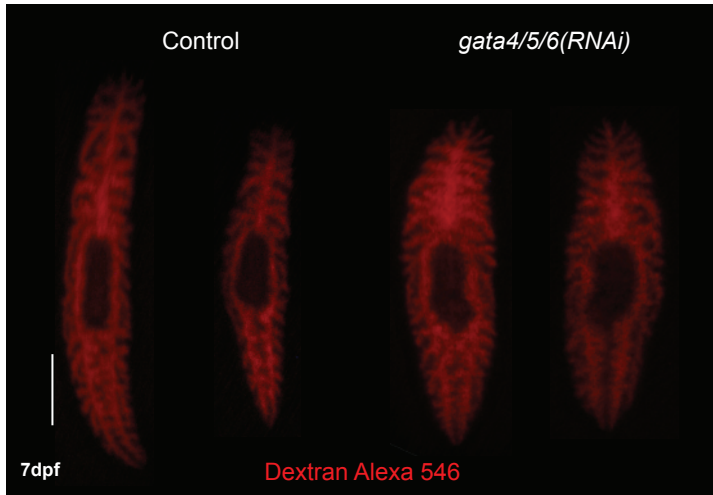

B

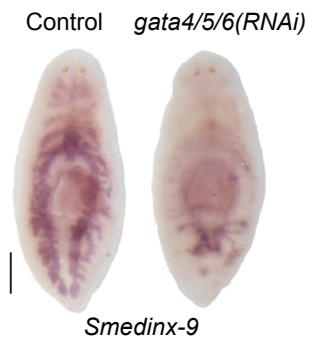

Supplement: NIHMS820016-supplement-3.pdf [file NIHMS820016-supplement-3.pdf]

Figure S3

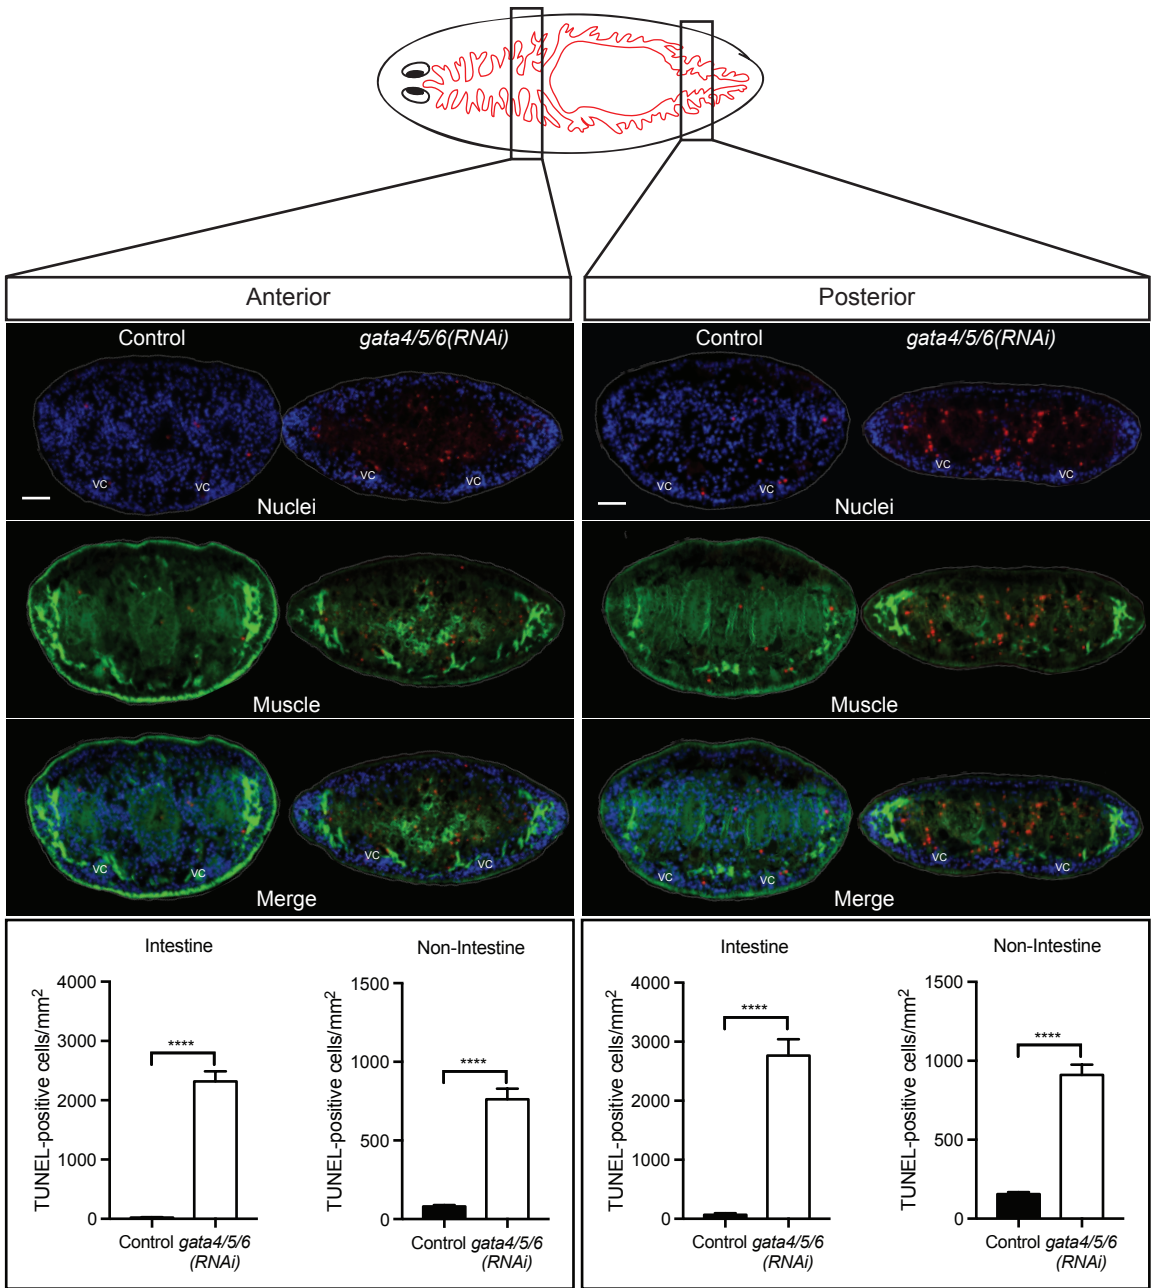

Supplement: NIHMS820016-supplement-4.pdf [file NIHMS820016-supplement-4.pdf]

Figure S4

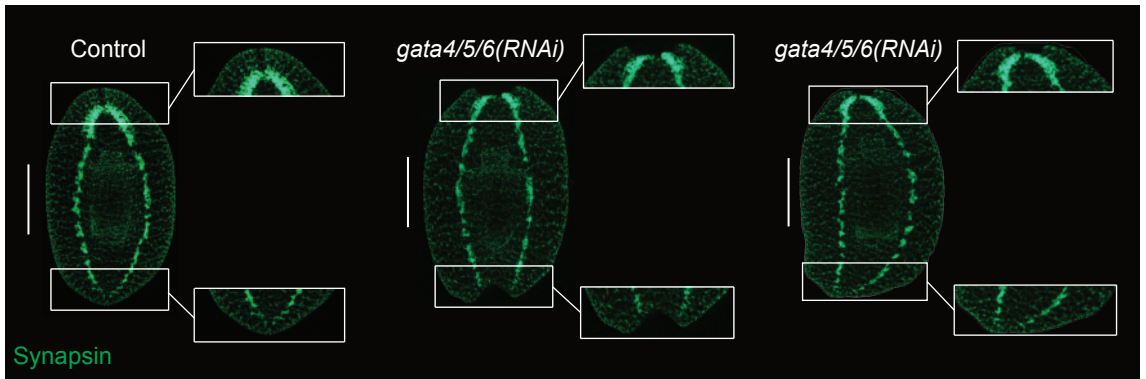

Supplement: NIHMS820016-supplement-5.pdf [file NIHMS820016-supplement-5.pdf]
